# Supplementary material
Source: publisher figshare collection journal article supplement (https://acs.figshare.com/ndownloader/files/12788654)

## Supplementary Information

### Isoxazolopyrimidine-based inhibitors of

#### *Plasmodium falciparum* dihydroorotate dehydrogenase with antimalarial activity

Sreekanth Kokkonda<sup>1</sup>, Farah El Mazouni<sup>2</sup>, Karen L. White<sup>3</sup>, John White<sup>1</sup>, David M. Shackleford<sup>3</sup>, Maria Jose Lafuente-Monasterio<sup>4</sup>, Paul Rowland<sup>4</sup>, Krishne Manjalanagara<sup>5</sup>, Jayan T. Joseph<sup>5</sup>, Adolfo Garcia-Pérez<sup>4</sup>, Jorge Fernandez<sup>4</sup>, Francisco Javier Gamo<sup>4</sup>, David Waterson<sup>6</sup>, Jeremy N. Burrows<sup>6</sup>, Michael J. Palmer<sup>6</sup>, Susan A. Charman<sup>3</sup>, Pradipsinh K. Rathod<sup>1</sup> and Margaret A. Phillips<sup>2\*</sup>

<sup>1</sup>Departments of Chemistry and Global Health, University of Washington, Seattle, WA , 98195, USA;

<sup>2</sup>Department of Biochemistry, University of Texas Southwestern Medical Center at Dallas, 5323 Harry Hines Blvd, Dallas, Texas, 75390-9038, USA; <sup>3</sup>Centre for Drug Candidate Optimisation, Monash Institute of Pharmaceutical Sciences, Monash University, Parkville, VIC 3052, Australia, <sup>4</sup>GSK, Tres Cantos Medicines Development Campus, Severo Ochoa, Madrid, 28760, Spain, <sup>5</sup>Syngene International Ltd, Bangalore, 560 099, India; <sup>6</sup>Medicines for Malaria Venture, 20, Route de Pré-Bois, 1215 Geneva, Switzerland.

\*Author to whom all correspondence should be addressed.

#### Table of Contents

Supplementary Table S1. X-ray data collection and refinement statistics for *Pf*DHODH bound to **15**

Supplementary Figure S1. Electron density difference maps for the **15** binding site on *Pf*DHODH

**Supplementary Table S1.** X-ray data collection and refinement statistics for compound **15**.

| Data collection                          |                           |
|------------------------------------------|---------------------------|
| Beam line/detector                       | ESRF ID23-1/ADSC Q315     |
| Resolution (Å)                           | 163-1.99 (2.29-1.99)      |
| Observations                             | 137823 (6539)             |
| Unique reflections                       | 35930 (1795)              |
| Completeness (spherical) (%)             | 46.8 (6.7)                |
| Completeness (ellipsoidal) (%)           | 90.2 (58.0)               |
| Multiplicity                             | 3.8 (3.6)                 |
| Mean $I/\sigma$                          | 11.3 (2.0)                |
| $R_{\text{merge}}$                       | 0.088 (0.631)             |
| $CC_{1/2}$                               | 0.997 (0.709)             |
| Refinement                               |                           |
| Resolution (Å)                           | 21.8-1.99 (2.05-1.99)     |
| Reflections                              | 35879 (18)                |
| $R_{\text{work}}/R_{\text{free}}$        | 0.163/0.206 (0.255/0.103) |
| Total number of atoms                    | 6488                      |
| Protein atoms                            | 5891                      |
| Ligand atoms                             | 128                       |
| Waters                                   | 469                       |
| <i>Average B-factors (Å<sup>2</sup>)</i> |                           |
| Protein (main chain/side chain)          | 43.1/52.2                 |
| Ligand atoms                             | 37.9                      |
| Waters                                   | 41.4                      |
| <i>RMS deviations from ideal values</i>  |                           |
| Bond lengths (Å)                         | 0.010                     |
| Bond angles (°)                          | 1.18                      |

Values for the highest resolution shell are given in parentheses

Preliminary structure refinement was carried out at 2.65 Å, where data completeness was 98.5% overall (98.7% for 2.70-2.65 Å).

**Supplementary Figure S1. Electron density difference maps in the 15 binding sites.** Initial  $F_o-F_c$  electron density maps contoured at  $3\sigma$  (green) and  $-3\sigma$  (red) superposed on the refined protein-inhibitor complex structure. Maps calculated after preliminary refinement of an unliganded protein model against the structure factors of the protein-inhibitor complex. Maps are shown for both subunits A and B observed in the asymmetric unit.

A subunit

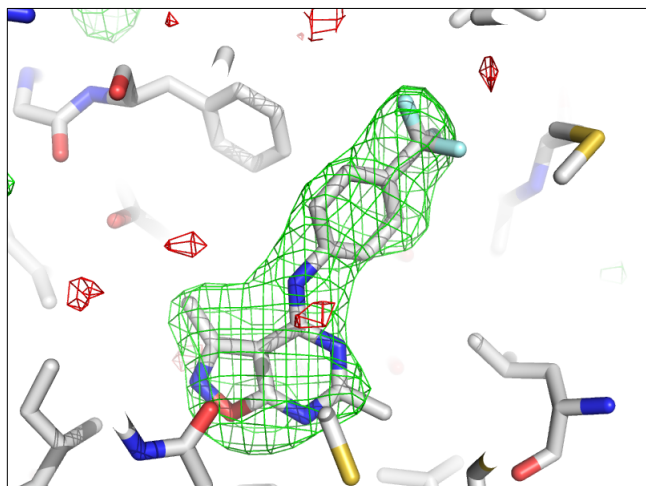

B subunit

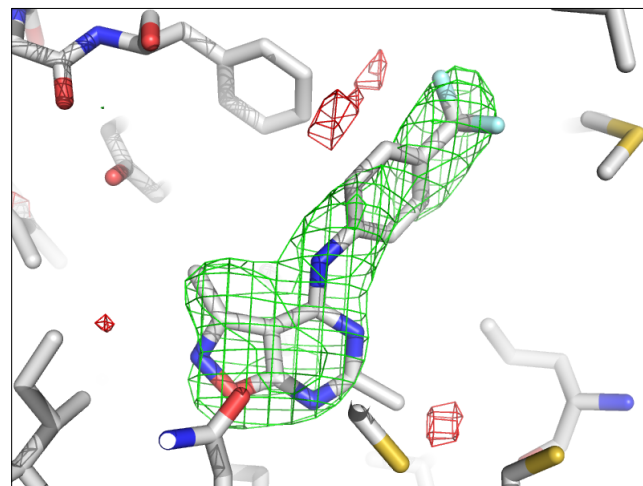

Supplement: Supplementary file 1 [file 12788654]
